24 **Abstract**

25

26 With the ever-increasing quality and quantity of imaging data in biomedical research comes the  
27 demand for computational methodologies that enable efficient and reliable automated extraction  
28 of the quantitative information contained within these images. One of the challenges in providing  
29 such methodology is the need for tailoring algorithms to the specifics of the data, limiting their  
30 areas of application. Here we present a broadly applicable approach to quantification and  
31 classification of complex shapes and patterns in biological or other multi-component formations.  
32 This approach integrates the mapping of all shape boundaries within an image onto a global  
33 information-rich graph and machine learning on the multidimensional measures of the graph. We  
34 demonstrated the power of this method by (1) extracting subtle structural differences from visually  
35 indistinguishable images in our phenotype rescue experiments using the endothelial tube  
36 formations assay, (2) training the algorithm to identify biophysical parameters underlying the  
37 formation of different multicellular networks in our simulation model of collective cell behavior,  
38 and (3) analyzing the response of U2OS cell cultures to a broad array of small molecule  
39 perturbations.

40

41

42 Author Summary

43

44 In this paper, we present a methodology that is based on mapping an arbitrary set of outlines onto  
45 a complete, strictly defined structure, in which every point representing the shape becomes a  
46 terminal point of a global graph. Because this mapping preserves the whole complexity of the  
47 shape, it allows for extracting the full scope of geometric features of any scale. Importantly, an  
48 extensive set of graph-based metrics in each image makes integration with machine learning  
49 routines highly efficient even for a small data sets and provide an opportunity to backtrack the  
50 subtle morphological features responsible for the automated distinction into image classes. The  
51 resulting tool provides efficient, versatile, and robust quantification of complex shapes and patterns  
52 in experimental images.

53

## 54 **Introduction**

55

56 Quantitative characterization of cell shapes and their organization within multicellular formations  
57 is critically important for many biomedical applications, including tissue engineering (Gupta et al.  
58 2009), phenotypic cell-based screening (Conrad et al. 2004, Viros et al. 2008), and testing  
59 platforms for drug discovery (Murphy et al. 2010, Zanella et al. 2010). However, broadly  
60 applicable and comprehensive morphometric analysis of complex geometries in imaging data  
61 remains a challenging task. Here we present an approach that allows for an efficient and precise  
62 extraction and classification of structural features in arbitrarily complex cellular patterns, including  
63 subtle variations that are difficult to decipher using visual inspection or a set of standard geometric  
64 measures.

65

66 Currently, a number of methods have been developed for the analysis of morphological changes  
67 among individual cells (Carpenter et al. 2006, Selinummi et al. 2005, Tsygankov et al. 2014).  
68 Some targeted approaches for extracting structural features in specific applications have been also  
69 reported (Guidolin et al. 2004, Khoo et al. 2011, Lin et al. 2005, Nguyen et al. 1994), but there is  
70 still a need for a *general* methodology allowing for automated comparative analysis of complex  
71 multicellular formations. In particular, it is difficult to study the effects of a small perturbation in  
72 the extracellular environment on the collective behavior of many cells and the patterns resulting  
73 from their complex interactions (Chernaya et al. 2018). This problem is exacerbated when working  
74 with experimental systems that allow for a precise control of different physical conditions  
75 generating large and diverse sets of imaging data. To address this issue, we have developed a  
76 general approach, which automatically generates a rich set of interpretable features from images

77 of cellular structures. These features are computed using a mathematically precise mapping of the  
78 boundaries outlining all shapes in an image onto a global graphical structure. This graphical  
79 structure captures multiple features relating to the width of the cellular objects, the shapes and  
80 roughness of the boundaries, as well as the connectivity and density of the cell clusters across the  
81 image. Using these features, we can identify images with similar structures, cluster images into  
82 groups based on structural patterns, and use the image-level characteristics for regression tasks.  
83 With this approach, one can cluster and visualize the differences between multicellular patterns  
84 based on high-level features, while still retaining the ability to interpret and understand the features  
85 defining each image type.

86

87 Unlike other graphical approaches which utilize morphological thinning (Boizeau et al. 2013,  
88 Carpentier et al. 2012, Guidolin et al. 2004) or rely on a heavily pruned skeleton (Grélard et al.  
89 2017, Ogniewicz and Kübler 1995, Rohde et al. 2008, Styner et al. 2003, Wearne et al. 2005,  
90 Xiong et al. 2010), ours exploits the exhaustive image-scale graph to capture both fine features on  
91 the boundary of the structures and coarse features of the objects' shapes. Furthermore, this  
92 approach is not limited to only work on networked structures. One can use this method to  
93 characterize changes in patterns of isolated cells and cell clusters, dense cellular networks, or any  
94 mixture of such formations.

95

96 As a testing system for our methodology, we first used an endothelial tube formation assay along  
97 with a computational model that simulates the formation of cellular patterns under controlled  
98 perturbations of the biomechanical properties of the cells. The tube formation assay is a useful *in-*  
99 *vitro* tool to screen for treatments that affect early stages of vasculogenesis. Healthy vascular

100 endothelial cells cultured on Matrigel form dense cellular networks across the dish. Environmental  
101 or genetic perturbations can alter the resulting structure, leading to more irregular networks or  
102 completely isolated cell clusters. The standard approach to quantify these assays is to count the  
103 number of tubules (connections between cell clusters) or measure the percent coverage of a cellular  
104 network within a certain field of view (Arnaoutova and Kleinman 2010). While these approaches  
105 can be used to screen for treatments that are strongly pro- or anti-angiogenic, they are not precise  
106 enough to distinguish between more similar patterns.

107

108 For experimental perturbation of collective cell behavior, we used knockdowns of the three CCM  
109 proteins, with and without treatment by a Rho-associated protein kinase (ROCK) inhibitor, H1152  
110 (Chernaya et al. 2018). These knockdowns all negatively affect tube formation and lead to either  
111 small isolated cell clusters or sparse patterns with large tubules depending on the targeted protein.  
112 Inhibition of ROCK partially rescues tube formation, increasing both tubule count and coverage,  
113 although the resulting cellular networks appear much more disorganized compared to wild-type.  
114 Here we show that features from the shape-to-graph mapping can differentiate images from these  
115 experiments, including the cases when images do not seem to be distinguishable and explain the  
116 differences between these visually similar groups using the features extracted from the mapping.

117

118 In addition to in-vitro assays, we utilized a simulated model that allowed us to generate a range of  
119 different multicellular patterns depending on two biomechanical characteristics: the stability of  
120 cell-cell contacts and the strength of cell-matrix adhesion (Chernaya et al. 2018). Altering these  
121 properties can create structures ranging from completely isolated cellular clusters to interconnected  
122 networks, all with varying densities. We apply our approach to predict the model parameters used

123 to generate each *in-silico* image, demonstrating that these features can capture the trends in the  
124 way cellular structures progressively change due to the controlled modulation of the biomechanical  
125 properties of the system.

126

127 Finally, to show that our methodology is not limited to mesh-like cell formations characteristic to  
128 specific cell types, we applied it to completely different type of data from a large imaging set  
129 publicly available at the Broad Bioimage Benchmark Collection [BBBC022v1] (Gustafsdottir et  
130 al. 2013, Ljosa et al. 2012). Specifically, we analyzed confluent cultures of U2OS cells subjected  
131 to an extensive set of small molecule treatments. The global (image-scale) nature of our graph  
132 structure, which captures both the shapes of all individual cells and their relative spatial positioning  
133 in the field of view, allowed us to outperform the conventional shape metrics in terms of precision  
134 and sensitivity of the phenotypic classification.

135

136 Collectively, the performed data analysis illustrated the power of our approach for both single cell  
137 and multicellular pattern characterization, capturing apparent and subtle geometric variations using  
138 a small set of images or a large high throughput scans, while providing a way to backtrack and  
139 interpret geometric features responsible for the classification outcome.

140

141 **Results**

142

143 *Shape-to-graph Mapping*

144

145 Our shape-to-graph mapping is a generalization of the Voronoi Diagram to accept the edges  
146 outlining a shape as inputs. The traditional Voronoi Diagrams only operate discrete sets of points  
147 such as in the default MATLAB algorithm (Aurenhammer 1991). Our algorithm is based on a  
148 sweep-circle method (Xin et al. 2013) modified to work with line inputs. The algorithm has  
149  $O(n \log n)$  complexity, where  $n$  is the number of inputs, which scales linearly with image  
150 resolution provided the same image content. Thus, the first step in the processing pipeline is to  
151 take any binary images as an input, and output a graphical structure, which maps all piecewise  
152 linear boundaries in the image to a unique image-scale graph spanning both the foreground and  
153 background of the image (**Fig. 1**).

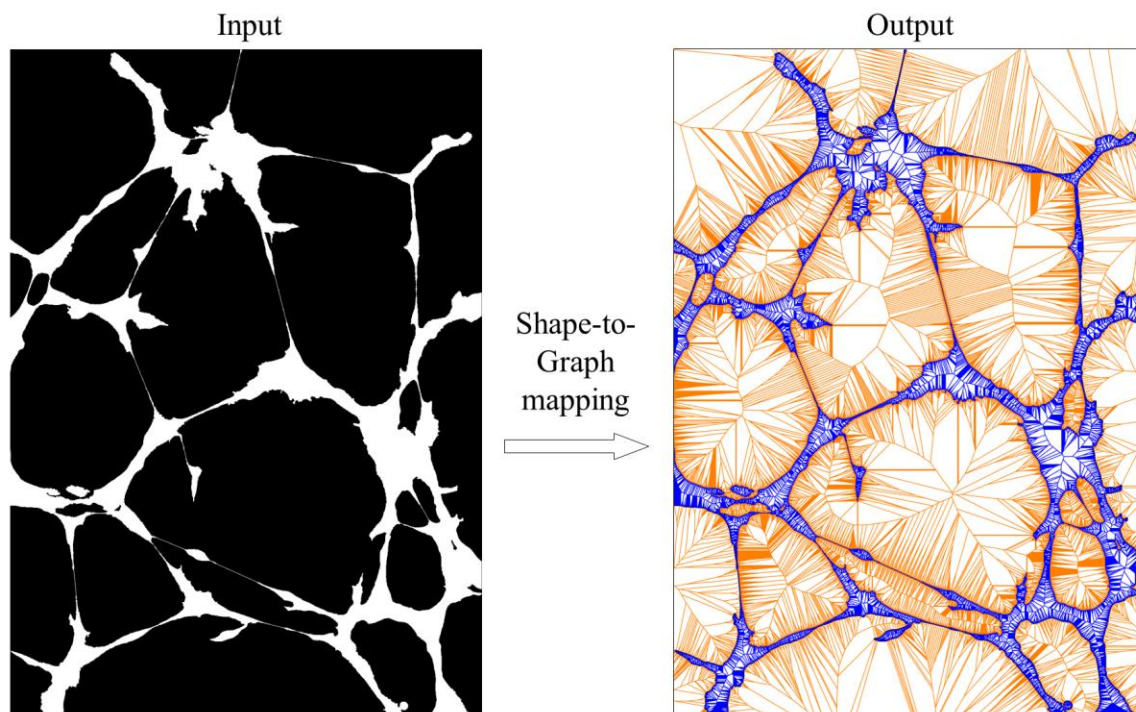

154



155 **Figure 1.** An illustration of the shape-to-graph mapping. Algorithm input is a binary image with the  
156 foreground (value 1) shown in white and the background (value 0) shown in black. Algorithm output is an  
157 image-scale graph structure. The part of the graph in the foreground (defined later in the text as in-graph)  
158 is shown in blue, while the part in the background (out-graph) is shown in orange.

159

### 160 **Graph construction process**

161

162 A Voronoi diagram consists of vertices, which are the centers of the largest circles that can be  
163 packed within a given set of inputs, such that no input element lies within the circles. Thus each  
164 graph vertex is the center of a circle tangent to three or more input elements, while the graph edges  
165 are bisectors between two inputs. Our graph satisfies these definitions but presents a generalized  
166 version of the Voronoi Diagram, which is derived from inputs that can include both a set of points  
167 and a set of line segments. However, our main interest is an input of pixel-scale line segments  
168 forming the boundaries in a binary image.

169

170 This graph can be constructed by searching through all circles tangent to any combination of three  
171 inputs, and removing circles which contain an input within it. However, this approach would have  
172  $O(n^3)$  complexity, where  $n$  is the input size. Instead, we use a sweep-circle method, in which we  
173 compute the Voronoi diagram within an expanding circle centered at the origin. Each input  
174 generates a bisector with the sweep circle (Xin et al. 2013). Such bisector can be an ellipse for a  
175 point input or a parabola for a line input. When a new input enters the sweep circle, its bisector  
176 will intercept with another bisector within the sweep circle. The set of all bisector segments that  
177 are not contained within another bisector is referred to as the *beachfront* (**Fig. 2**). The interceptions  
178 between two arcs of the beachfront always lie on bisectors between the inputs, which trace out

179 edges in the Voronoi diagram. To find the graph vertices, we only need to test inputs which have  
180 adjacent arcs on the beachfront. The ordering of arcs on the beachfront are stored within a red-  
181 black balanced binary tree (Xin et al. 2013), therefore the position of a new point within the  
182 beachfront can be found with a binary search. Thus, the complexity with this approach scales as  
183  $O(n \log n)$  with the number of inputs. For a more detailed, formal description of the sweep-circle  
184 algorithm, see (Xin et al. 2013). Constricted this way, each Voronoi vertex has three Voronoi edges  
185 Even in cases when the Voronoi vertex is equidistant to four or more inputs, such as the center of  
186 a regular polygon, multiple Voronoi vertices are created at the same position, each with a degree  
187 of three and a zero-length edge connecting them.

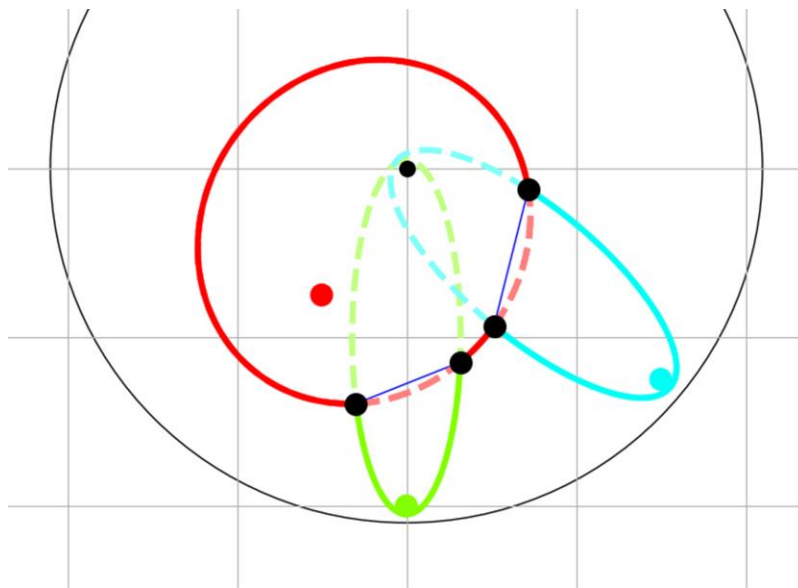

188  
189 **Figure 2.** Sweep-circle Voronoi algorithm for the graph construction. In this algorithm, a sweep circle  
190 (grey circle) expands from the center of the image (grey dot). Each input point (colored dots) forms a  
191 bisector (colored ellipses) with the expanding sweep circle. The beachfront is a set of all outer most portions  
192 (solid elliptical arcs) of these bisectors. The intersections between the ellipses (black dots) trace out  
193 Voronoi edges (blue lines). When two intersection points merge, pinching out a beachfront arc, a new  
194 Voronoi vertex is formed.

195

196 To extract the algorithm input from a binary image, we trace the boundaries along the half-pixel  
197 border separating the background and foreground pixels. This is different from the conventional  
198 tracing of boundaries along the pixel centers but ensures that a horizontal or vertical line of pixels  
199 will have the width of one, rather than zero, which allows us to include pixel-size features to the  
200 image analysis. (**Fig. 3A-C**)

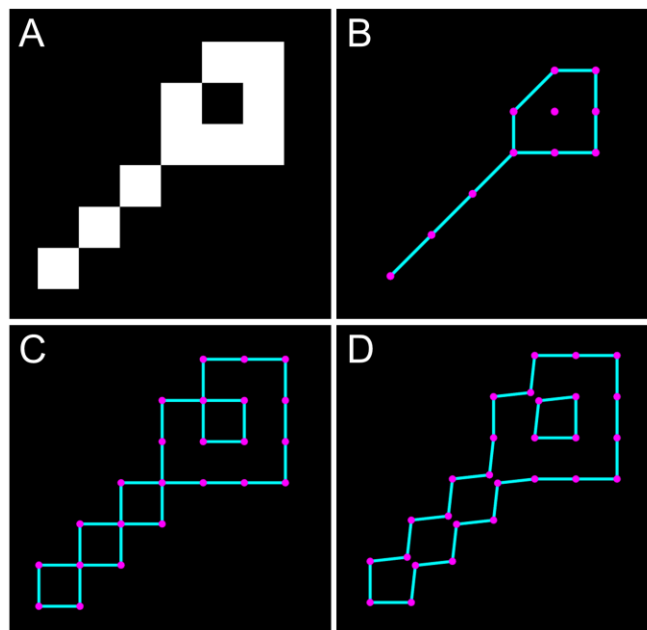

201  
202 **Figure 3.** Boundary tracing. **A.** A simplified example of an input image. **B.** The conventional tracing of the  
203 boundary (implemented in MATLAB) along the centers of the pixels at the edge of a foreground object. **C.**  
204 Our algorithm traces the boundary directly along the lines separating the foreground and background  
205 pixels. **D.** An illustration of how the algorithm eliminates all boundary self-crossings by a small non-  
206 disruptive off-diagonal shift (here the shift was exaggerated for the illustration purposes).

207  
208 If two boundary points overlap, such as when two foreground pixels are connected diagonally,  
209 these points are separated in the off-diagonal direction by a very small distance (we used 1/20 of  
210 the pixel size) to ensure that boundaries in the image never intersect or self-cross but  
211 unambiguously enclose the corresponding objects and holes (**Fig. 3D**).

212 **Graph annotation**

213

214 All connected components in the foreground (objects) and background (holes) of the binary image  
215 are identified and assigned a unique numerical label. Boundaries are additionally categorized into  
216 two types: *exterior boundaries* that completely enclose a foreground object and *interior*  
217 *boundaries* that enclose a hole and, in turn, are enclosed by an object (**Fig. 4A**). Once the complete  
218 graph is contracted, we will refer to the part of the graph situated in the image foreground as *in-*  
219 *graph* and the part in the image background as *out-graph* (**Fig. 4B**).

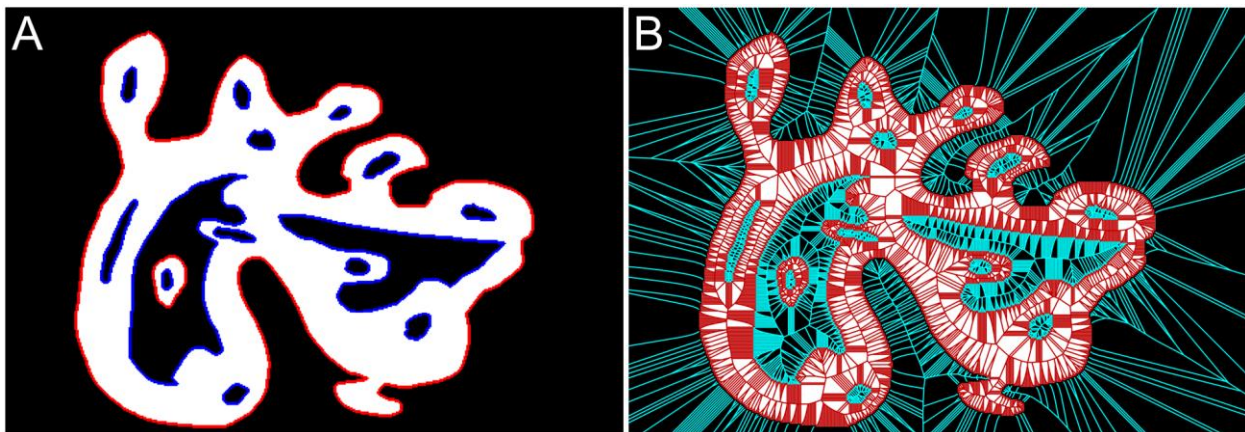

220

221 **Figure 4. A.** Boundary annotation: exterior boundaries are shown in red, while interior boundaries are  
222 should blue. **B.** Overall graph annotation: in-graph is shown in red, while the out-graph is shown in cyan.

223

224 Graph vertices that are equidistant to exactly two different boundaries form a sequence of vertices  
225 that we call *bridges*. Different bridges come together at graph vertices that are equidistant to three  
226 or more different boundaries and identified here as *hubs* (**Fig. 5A**). Additionally, a sequence of  
227 vertices that connect two looped bridges associated with the same boundary, which may occur  
228 when there is a hole within an extended protrusion of an object, is referred here as a *connector*.  
229 Identifying all bridges, hubs, and connectors allows us to partition the whole graph into non-

230 overlapping *subgraphs* uniquely associated with each interior or exterior boundary (**Fig. 5B**).  
231 Extracting features from their subgraphs is central to our methodology.

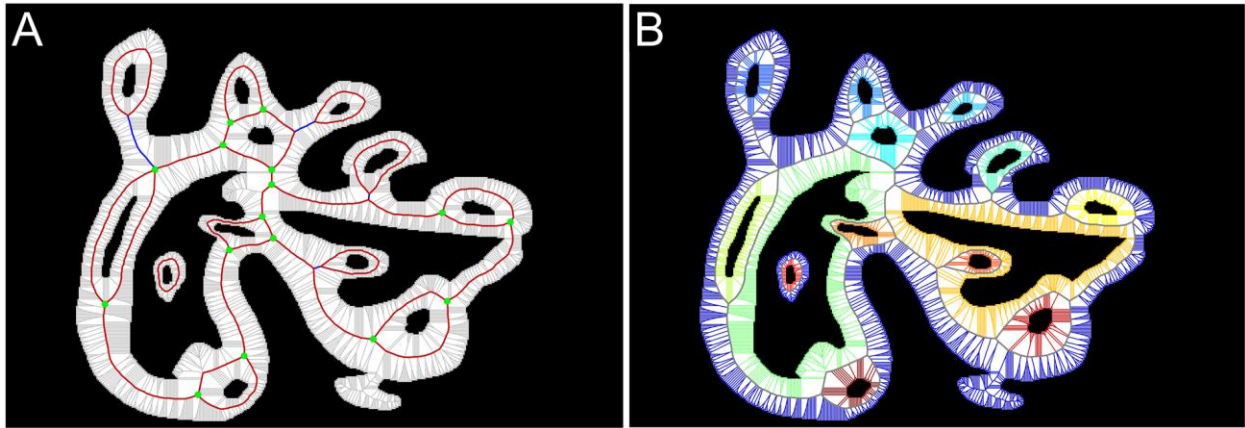

232  
233 **Figure 5.** The key elements of the graph. **A.** All bridges (red), hubs (green), and connectors (blue) of the  
234 in-graph. **B.** Partitioning of the in-graph into subgraphs (shown with unique colors). Each non-overlapping  
235 subgraph is associated with exactly one interior or exterior boundary.

### 236 **Graph-based Feature Extraction**

237  
238 Each vertex in the constructed graph represents the center of a circle inscribed within the object.  
239 A subgraph with no bridges, such as the graph within a single-boundary object with no holes or a  
240 hole with no objects inside, is a single tree with the root node being the center of the largest  
241 inscribed circle. Otherwise, a subset of vertices located on the graph bridges and connectors of the  
242 associated subgraph acts as a set of the roots, from which graph edges branch out towards the  
243 corresponding boundary (**Fig. 6A,B**). Constructed this way, each subgraph is outlined by the  
244 boundary on one side and by a continuous sequence of bridges and connectors on the other side.  
245 We will call this sequence of bridges and connectors the *root path*. Again, in case of objects with  
246 no holes, there are no bridges, and the root path is defined as the longest path to the boundary

247 which passes through the single root node. Based on this construction, we derive two primary  
248 metrics for each subgraph, which we call the *width profile* and the *boundary profile*.

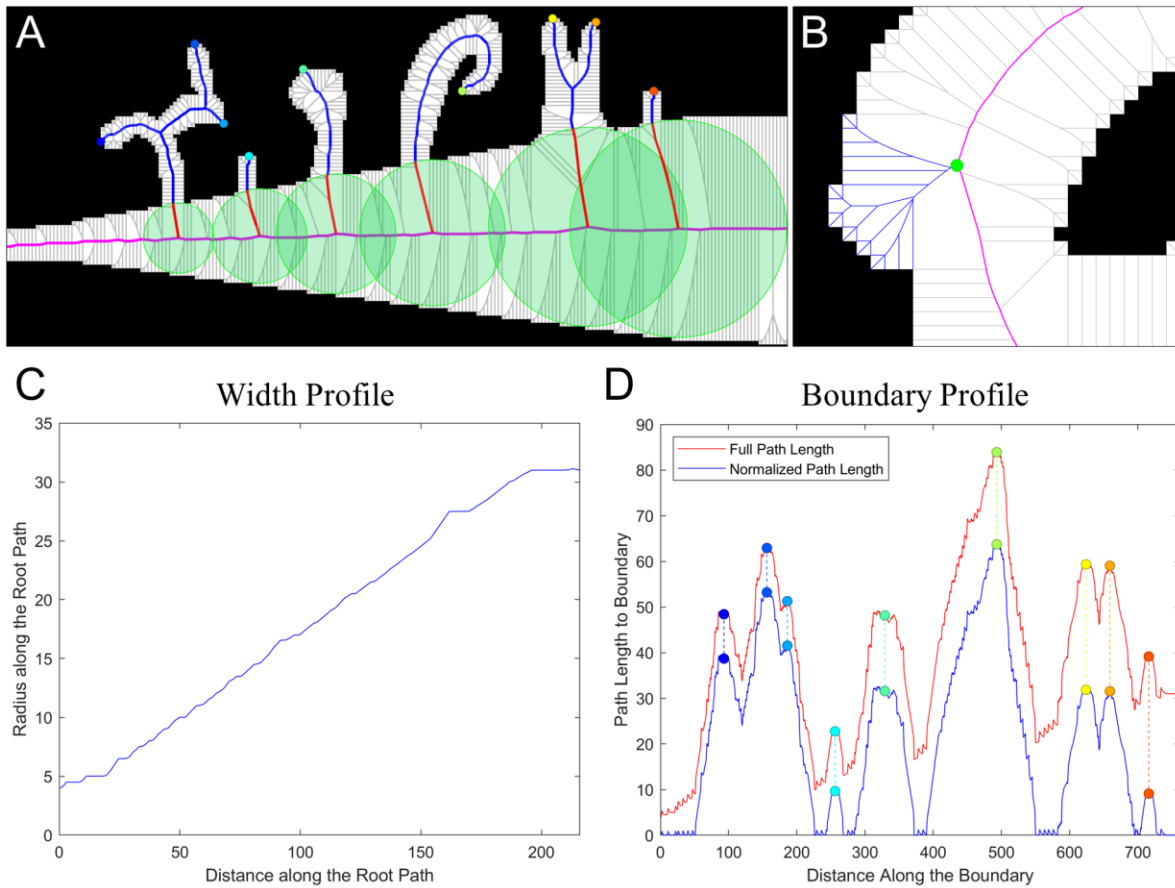

249  
250 **Figure 6.** The primary graph metrics. **A.** An example of paths along the graph edges from the root path  
251 (magenta) to the tips of object protrusions. The inscribed circles (green) provide a measure for the width  
252 profile. The parts of the paths (blue) outside the circles provide a measure for the normalized boundary  
253 profile. **B.** An illustration of path (blue) branching from a root (green) to the boundary, so that each  
254 boundary point has an associated root node and a shortest path to this node along the graph edges. **C.** The  
255 resulting width profile showing the inscribed circle radii for every node on the root path. **D.** The resulting  
256 boundary profile before subtracting the radii of the corresponding root nodes (red) and after subtracting  
257 (blue). The colored points at the local maxima of the boundary profile correspond to the protrusion tips in  
258 **A.**

259 The *width profile* describes coarse variations in the subgraph's width defined as the radii of the  
260 inscribed circles with the centers located at the vertices of the root path (**Fig. 6C**). When computed  
261 in background regions, this captures local variations in density. The *boundary profile* captures the  
262 size of any protrusion or bump which lies along the boundary. The boundary profile is computed  
263 by measuring the shortest distance along the subgraph edges from all points along the boundary to  
264 the corresponding root nodes. By using distances along the subgraph edges, we accurately  
265 characterize the size of these features even if the boundary is highly curved. To ensure that the  
266 boundary profile is not sensitive to the same variations in object size as the width profile, the  
267 boundary profile is normalized at each point by subtracting the radius on the inscribed circle with  
268 the center at the root node where the path to that boundary point begins (**Fig. 6D**).

269

270 Because each boundary has a corresponding subgraph in both the in-graph and out-graph parts of  
271 the full graph, each boundary has a foreground and background width profile along with a  
272 foreground and background boundary profile. The only exception would be the most outward  
273 boundaries, for which out-graphs extend to infinity. To resolve this issue, we constrain the graph  
274 within the image by using the image boundary as the most outward boundary.

275

### 276 *Per-Image Structural Features*

277

278 In order to characterize or compare complex geometric structures such as multicellular patterns,  
279 per-boundary classification would be insufficient as we must consider the features of all  
280 boundaries to account for the overall structure of a pattern in an image. Thus we construct a set of  
281 per-image features derived from our graph-based per-boundary features.

282

283 To this end, we start with associating each boundary with 40 features, including distribution  
284 metrics for the width profile and boundary profile, along with the area and perimeter of each  
285 boundary. Half of the features computed for each boundary come from the corresponding in-graph  
286 and half from the out-graph. The full list of features is provided in the **Supplemental Table 1**.  
287 Next, we perform k-means clustering on the list of all boundaries across all provided images (**Fig.**  
288 **7**). This process creates a histogram of  $N$  boundary types within each image. The goal of this  
289 clustering is to automatically differentiate boundaries based on a combination of their roughness,  
290 the size and shape of the enclosed objects and holes, and the relative separation of these objects  
291 and holes. This means that holes or objects with the same shape may lie in different clusters if the  
292 cellular structure around the hole is thicker or thinner, or if the object lies in a more or less dense  
293 region. The count or frequency of the boundary types in each image then serves as a per-image  
294 feature (**Fig. 8**). The specific interpretation of each boundary type depends on the nature of data  
295 presented in the images under investigation, but this is what ultimately allows us to understand  
296 differences in the structural organization of the patterns in imaging data sets, as we show in the  
297 next section.

298

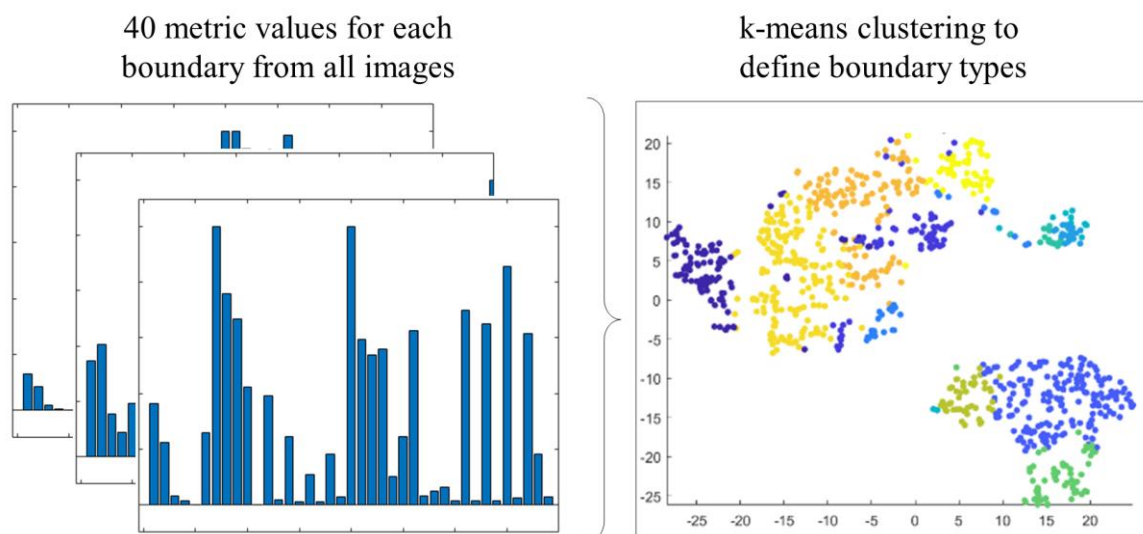



299 **Figure 7.** Boundary type identification. We use 40 metrics extracted for each boundary from all the images  
300 in a given set and use  $k$ -means to associate each boundary with one of the  $N$  classes.

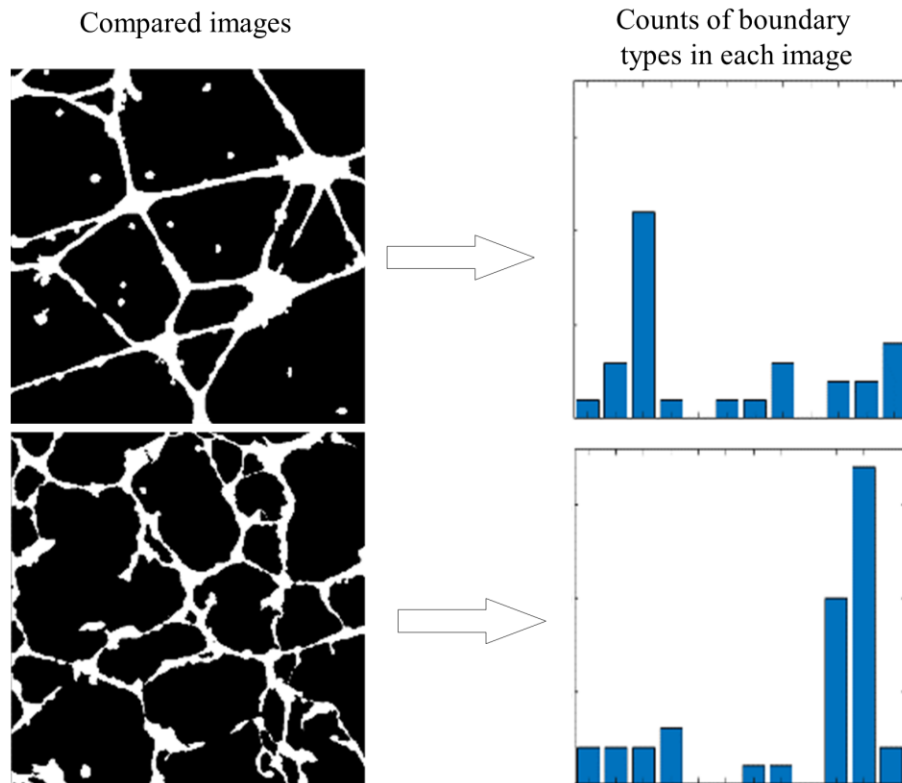

302 **Figure 8.** Per-image characterization. For each image, we extract the counts of boundaries that belong to  
303 each of  $N$  boundary types, which were determined using  $k$ -means clustering on the 40 boundary features.

### 304 **Analysis of In-Vitro Tube Formations**

305

306 In this section we test the ability of our method to identify subtle structural difference in a small  
307 set of images from an in vitro endothelial tube formation assay (the experimental data has been  
308 previously published in (Chernaya et al. 2018)). The set includes images of the control cell (wild-  
309 type HUVEC) and cells with knockdown (KD) of the three Cerebral Cavernous Malformation  
310 (CCM) proteins, CCM1 (or KRIT1), CCM2, and CCM3 (or PDCD10), which disrupts the integrity  
311 of multicellular mesh. In addition, the control and KD cells were treated with an inhibitor of Rho-

312 associated protein kinase (ROCK), which was shown to be over-activated in CCM KD cultures  
313 (Chernaya et al. 2018). The treatment with the ROCK inhibitor H1152 partially rescues the wild-  
314 type (WT) phenotype, although the resulting cellular patterns in the tube formation assay do not  
315 closely match the WT patterns. Previously, we showed that although the diseased and the H1152  
316 treated phenotypes are clearly different from the *untreated* WT phenotype, some treated cultures  
317 are indistinguishable from the *treated* WT cells both visually and based on the traditional  
318 geometric measures(Chernaya et al. 2018). Here we show that our shape-to-graph approach allows  
319 us to identify the distinguishing features in all the phenotypes, including the ones with subtle  
320 disparities that are not apparent upon visual inspection. The latter are of the main interest from the  
321 methodology testing perspective.

322

323 For each of eight phenotypes (WT, CCM1, CCM2, CCM3, WT<sup>H1152</sup>, CCM1<sup>H1152</sup>, CCM2<sup>H1152</sup>,  
324 CCM3<sup>H1152</sup>), we used five representative fields of view (**Fig. 9A**). The boundaries were clustered  
325 into 12 boundary types using k-means clustering. The optimal number of boundary types was  
326 selected by performing 3-nearest neighbor classification on each image, where the class of each  
327 image was determined by the class corresponding to the three most similar boundary type  
328 histograms in the image set. Twelve clusters had a 90% classification accuracy (**Supplemental**  
329 **Fig. S1**).

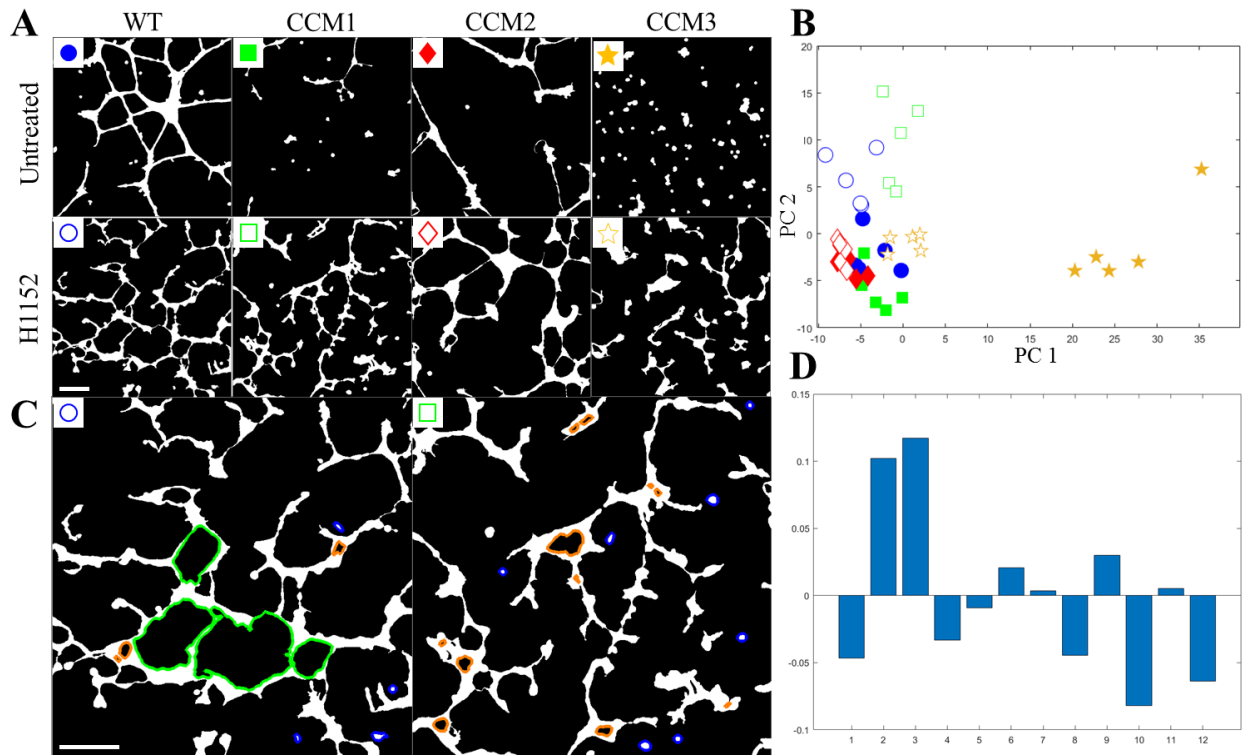

330

331 **Figure 9. Comparison of in-vitro tube formation assay structures with eight different phenotypes.** A. The  
 332 eight phenotypes resulted from WT and the knockdown of three CCM proteins, all with and without  
 333 treatment by the ROCK inhibitor. Knockdown of the CCM proteins is associated with the disruption of the  
 334 otherwise connected mesh. ROCK inhibitor leads to a more connected but still noticeably disorganized  
 335 network. The scale bar is 200  $\mu$ m. B. The first two principal components of each image's boundary type  
 336 histogram. Images of a similar type and appearance tend to have similar histograms. Here, the markers  
 337 indicate the corresponding images in A. C. Two images from WT<sup>H1152</sup> and CCM1<sup>H1152</sup> that appear visually  
 338 similar but have significantly different boundary type counts. Boundaries that are responsible for the  
 339 difference are highlighted in blue and cyan. The scale bar is 200  $\mu$ m. D. The difference of the boundary  
 340 type frequency histograms for CCM1<sup>H1152</sup> and WT<sup>H1152</sup>. Boundary types 2 and 3 (Blue, orange)  
 341 corresponding to small, isolated objects and small holes in wider locations in the network, appear  
 342 significantly more often in CCM1<sup>H1152</sup> formations as compared to otherwise similar WT<sup>H1152</sup> structures.  
 343 WT<sup>H1152</sup> structures tend to have more of boundary type 10 (Green), which are medium sized holes with more  
 344 bumps and protrusions extending into the hole.

345

346 Principal component analysis (PCA) was performed on the matrix of per-image boundary  
347 histograms. Generally, images of the same class group together and exist in space near images  
348 with similar structural features (**Fig. 9B**). Groups that are visually distinct, such as CCM3 cultures,  
349 which have several small cellular clusters, appear far from H1152-treated cultures with fully  
350 connected cell networks. Similarly, images with thicker structures, such as in CCM2<sup>H1152</sup> cultures,  
351 appear further in principal component space from images with thinner structures, such as in  
352 CCM1<sup>H1152</sup> and WT<sup>H1152</sup> cultures. Visually similar structures of CCM1<sup>H1152</sup> and WT<sup>H1152</sup> (**Fig. 9C**),  
353 which both have many thin, disorganized connections, appear nearer to each other in principal  
354 component space. Significantly different boundary types between sets of images can be identified  
355 from the average boundary frequency histograms (**Fig. 9D**). This difference corresponds to an  
356 increased frequency of three boundary types: type 2 consists of the *small isolated objects in regions*  
357 *of high density* which appear more often in CCM1<sup>H1152</sup> cultures (blue boundaries in **Fig. 9C**); type  
358 3 includes small holes in thick regions of the cellular structure, which also occur more frequently  
359 in CCM1<sup>H1152</sup> (orange boundaries in **Fig. 9C**); type 10 includes medium size holes, typically with  
360 more bumps or protrusions from the cellular network extending into the hole, which occurs more  
361 frequently in WT<sup>H1152</sup> samples (green boundaries in **Fig. 9C**). Descriptions of the boundary types  
362 can be determined by analyzing the distribution of the original boundary metrics within each type  
363 (**Supplemental Fig. S2**).

364

365

366

367

368 *Analysis of Simulated Data*

369

370 We used a previously developed computational model of endothelial tube formation (Chernaya et  
371 al. 2018) to simulate 100 images of different cellular patterns corresponding to changes in two  
372 biomechanical characteristics of cell interaction.

373

374 In this simulation model, each individual cell from a large group (hundreds to thousands) of cells  
375 sparsely distributed over the substrate surface is represented as an extendable half-ellipsoid with  
376 stochastically extending and retracting protrusions. Protrusions that extend downwards are  
377 responsible for cell-substrate interactions, while protrusions that extend sideways along the surface  
378 are responsible for cell-cell interactions. Cells form attachments when protrusions either reach  
379 deep enough into the substrate, or when it reaches another cell. Retraction of the attached  
380 protrusions leads to the cell movement, changes in cell shapes, and the buildup of the mechanical  
381 stress that can lead to the contact breakage. Ultimately, because of these cell-cell and cell-substrate  
382 interactions, the multicellular system evolves to form different patterns depending on the model  
383 parameters at the cell level. Two key parameters of interest here are the stability of cell-cell and  
384 cell-ECM adhesions. With properly selected values of the parameters, the model produces a dense  
385 cellular network closely resembling wild-type endothelial cells in our in-vitro tube formation assay.  
386 Reducing the values of each parameter leads to either a more sparse network or a number of  
387 isolated cell clusters, similar to the behavior of cell with the knockdown of CCM1 and CCM3. It  
388 is important to note here that even with a fixed set of parameters, the stochastic nature of protrusion  
389 dynamics and a random initial distribution of cells make the structures resulted in simulations vary;  
390 so that multiple patterns can be generated for the same phenotype similar to the experimental data.

391 As we vary the two parameters representing the stability of cell contacts, our simulations allow us  
392 to generate a sequence of cell formations with progressively changing structures (**Fig. 10A**).  
393 Variation in the stability of cell-cell contact, the parameter  $\kappa_{lat}$  in the probability of contact  
394 breakage  $P_{cell-cell} = 1 - \exp(-l^2/\kappa_{lat}^2)$ , where  $l$  is the extension of the contact spring in the  
395 model, has a strong impact on the boundary metrics. As this parameter is increased, cells go from  
396 forming completely isolated cell clusters to a completely interconnected network. This leads to an  
397 overall reduction in boundary types corresponding to isolated cell clusters, and a shift towards  
398 networked structures with medium to large sized holes. The other parameter,  $\kappa_{bott}$  in the  
399 probability of cell-substrate contact breakage  $P_{cell-ECM} = 1 - \exp(-l^2/\kappa_{bott}^2)$ , primarily affects  
400 the velocity of cell movement and the resulting density of the cell clusters. The way this parameter  
401 impacts the resulting structure depends on the network connectivity in the multicellular pattern,  
402 but generally controls the density of the structure, with low values causing cells to form larger and  
403 more sparse clusters.

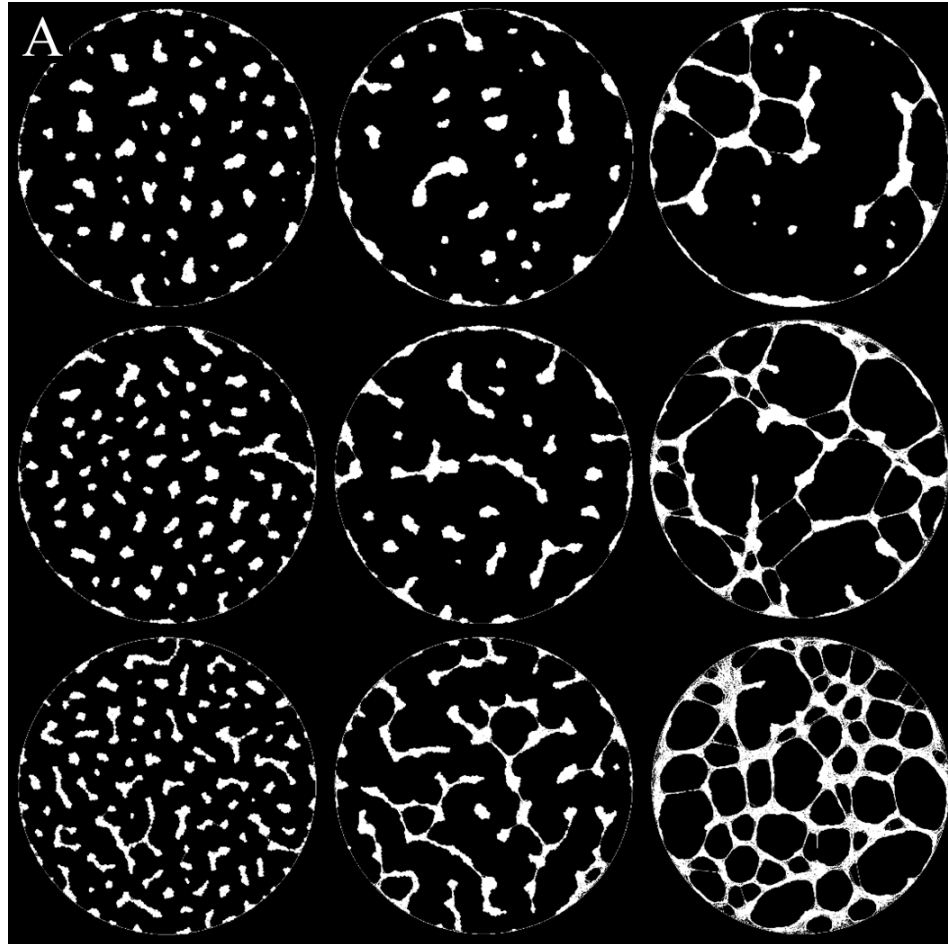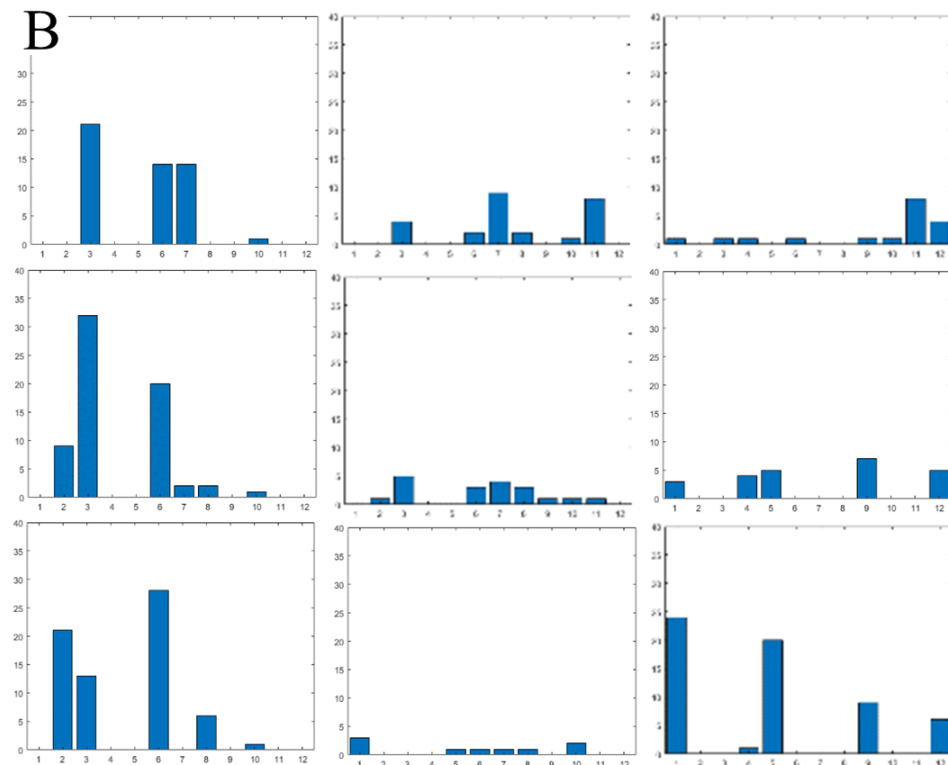

405 **Figure 10. A.** *Nine representative images of multicellular formations out of 100 that were generated by*  
406 *varying two parameters: the strength of cell-ECM adhesion (vertical axis) and the stability of cell-cell*  
407 *contacts (horizontal axis). B.* *Variations of the two parameters result in visible changes in the boundary*  
408 *type histograms.*

409

410 We applied our shape-to-graph mapping to the 100 generated images, extracted the boundary  
411 features, and clustered boundaries to create a histogram of boundary types for each image. By  
412 plotting the boundary type histograms, we can see the trends in the boundary type distribution  
413 when the two parameters are varied (**Fig. 10B**) as described above. A multi-regression model was  
414 used to predict the log-transformed values of the two model parameters based on the count of each  
415 boundary type in each image (**Fig. 11**). If these parameters have a predictable impact on the  
416 resulting multicellular pattern, and if the shape-to-graph mapping captures features that properly  
417 reflect these changes, then this multi-regression model should be able to reproduce trends in the  
418 two model parameters purely from the structural aspects of the cell patterns in the resulting images.  
419 Indeed, our approach allowed us to predict the parameter values with high accuracy: log-  
420 transformed cell-cell adhesion had a mean average error of 0.2392 with values ranging from 5 to  
421 8 and a correlation coefficient of 0.9977, while log-transformed cell-ECM adhesion had a mean  
422 average error of 0.2782 and a correlation coefficient of 0.86695. Twelve boundary clusters were  
423 used based on cross validation performance.



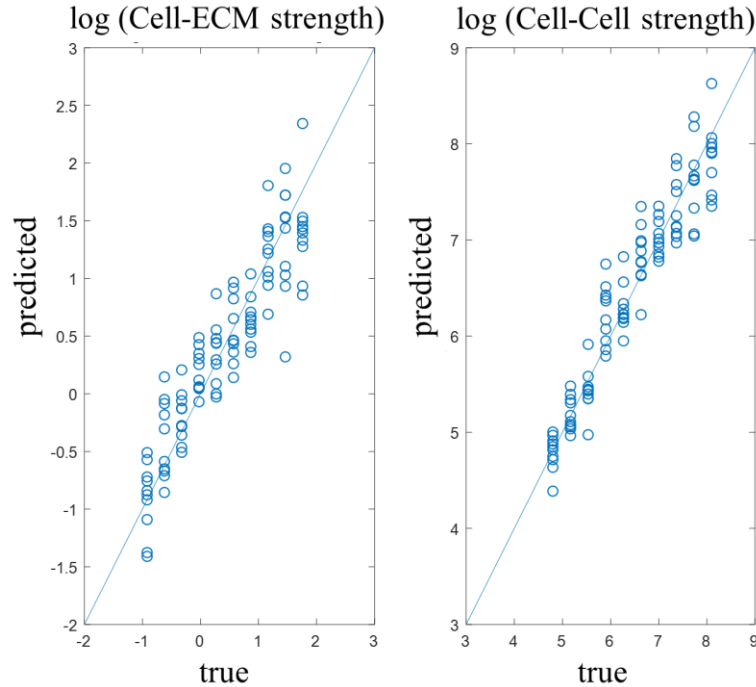

424

425 **Figure 11.** A linear regression model was trained to predict log-transformed model parameters from the  
426 boundary type histograms. The mean average error in predicting cell-cell adhesion was 0.2392, while  
427 predicting the strength of cell-ECM adhesion had the mean average error of 0.2782.

428

429 **Analysis of individual cells in a high throughput assay profiling small-molecules-induced cell**  
430 **cultures.**

431

432 In the previous sections we have focused on the analysis of complex multicellular formation with  
433 a mesh-like structures. However, our methodology is not limited to that particular type of data and  
434 can be adapted for the analysis of any images that can be segmented into the object(s) of interest  
435 and the background. To illustrate this statement, we applied our method to analyze *individually*  
436 *segmented* cells in a large publicly available image set with cell cultures subjected to phenotype  
437 perturbations by a variety of small molecules. We used image set BBBC022v1 , available from  
438 the Broad Bioimage Benchmark Collection (Ljosa et al. 2013). The original dataset consists of

439 fluorescent microscopy images of U2OS cells treated with one of over 1600 compounds. Five  
440 fluorescent channels were captured for each field of view. The dyes used for visualization included  
441 Hoechst 33342 (nuclei), concanavalin A (endoplasmic reticulum), SYTO 14 (nucleoli), phalloidin  
442 (actin), and WGA (Golgi complex). A CellProfiler (Carpenter et al. 2006) pipeline provided with  
443 the dataset was used to segment individual cells in each field of view via the watershed algorithm.  
444 The samples were split into 20 plates with 384 wells each. Nine fields of view were obtained for  
445 each well.

446

447 In the previous sections, our analysis relied on the input images for the shape-to-graph algorithm  
448 in the form of binary masks, in which the extracted boundaries separated the cellular structure from  
449 the background. However, in the imaging data we use here, each cell is treated as an individual  
450 object, and therefore may share a boundary with either the background or other cells. This can  
451 cause some cell boundaries to overlap (**Fig. 12A**). To ensure cell boundaries do not overlap, we  
452 added a subpixel separation of the boundaries by shifting boundary points half-way from the  
453 previously defined half-pixel boundaries towards the corresponding pixel center (**Fig. 12B**). This  
454 means one-pixel wide objects are thinned to have a width of half a pixel, and a half-pixel size gap  
455 is enforced to appear between two touching objects.

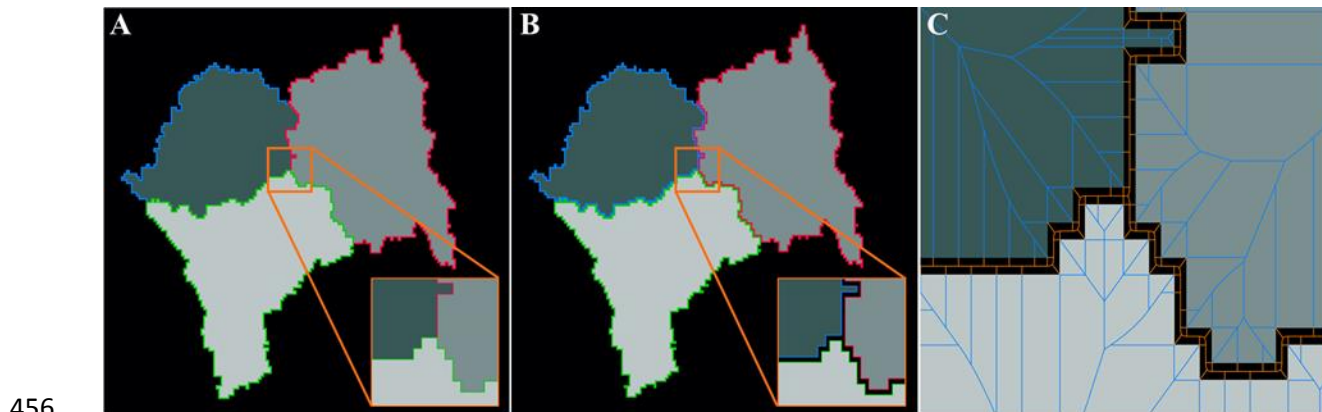

457 **Figure 12.** *A modified boundary tracing for individual cells in a tight cluster. A. With the previously*  
458 *described boundary tracing, boundaries of contacting cells will overlap. B. The tracing routine is modified*  
459 *to place boundary points halfway between the pixel center and our original half-pixel type tracing. This*  
460 *creates a half-pixel gap between bordering cells. C. Parts of the out-graph for each cell (orange) lies within*  
461 *this gap. Thus, the image out-graphs will include the out-graph nodes between all the contacting cells,*  
462 *effectively encoding the spatial distribution of the cells in the image.*

463  
464 With this processing approach, the cells are presented as individual objects embedded in an image-  
465 scale mesh-like background (**Fig. 12C**), so that the graph representation of the background (out-  
466 graph) encodes the information about the positional organization of all the cells and degree of  
467 confluency of the whole cell culture.

468  
469 For our analysis, we selected 11 compounds which the authors identified as forming strong clusters  
470 based on their known mechanism of action and the 824 textural and morphological features they  
471 extracted for each image. These compound clusters include tubulin modulators (fenbendazole,  
472 oxibendazole, taxol) (**Fig. 13A**), modulators of neuronal receptors (fluphenazine, metoclopramide,  
473 procaine) (**Fig. 13B**), and structurally related cardenolide glycosides (digoxin, lanatoside C,  
474 peruvoside, neriifolin, digitoxin) (**Fig. 13C**). We also included control samples from the same  
475 assays (**Fig. 13D**). We investigated if we could predict these mechanisms of action utilizing the  
476 shape metrics derived from our shape-to-graph mapping. To this end, we extract the previously  
477 described set of measures for each object in each image. The mean and standard deviation of these  
478 per-cell metrics are computed across each well. To account for variance between plates, we  
479 subtracted the feature vector of each well by the median feature vector of the control wells in the

480 same plate. In the end, this resulted in 208 control wells, 12 samples of tubulin modulators, 12  
481 samples of neuronal receptor modulators, and 24 samples of structurally related cardenolides.

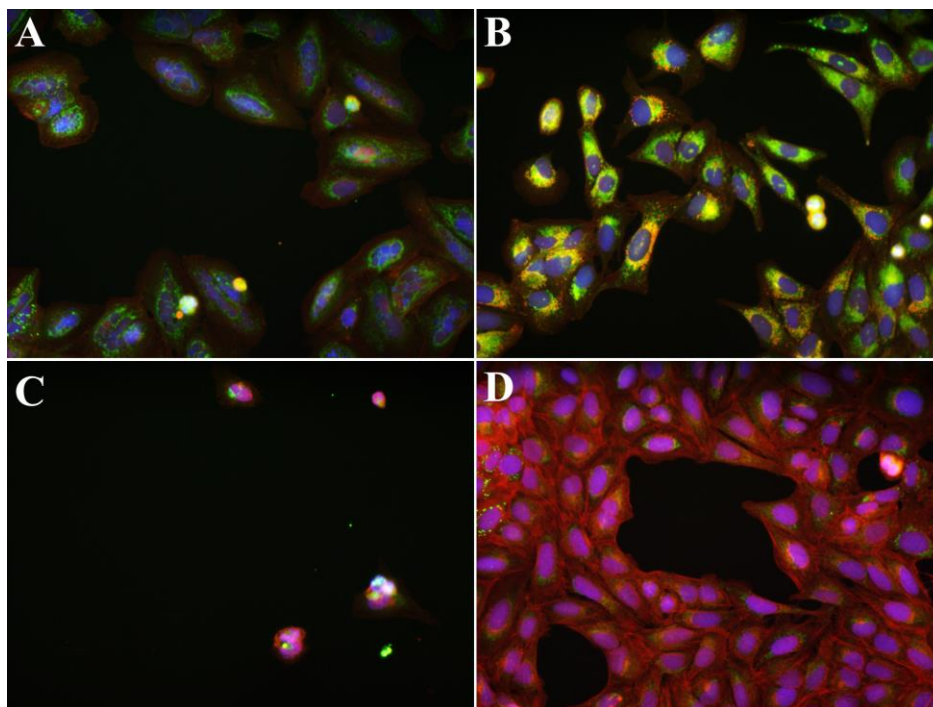

482  
483 **Figure 13.** Images from the U2OS dataset. Red channel is phalloidin, blue is Hoechst 33342, and green is  
484 WGA. A) Example image from the untreated group. B) Image of cells treated with taxol from the tubulin  
485 modulators group. C) Image of cells treated with metoclopramide from the modulator of neuronal receptors  
486 group. D) Image of cells treated with digoxin from the structurally related cardenolide glycosides group.

487  
488 Once the metrics were extracted, each plate was individually held-out, and a decision tree trained  
489 on the wells in the remaining 19 plates were used to predict the held-out well labels. Shape-to-  
490 graph features had a mean  $F_1$  score of 0.916 (defined as  $2 * \frac{precision * recall}{precision + recall}$ , where  $recall =$   
491  $\frac{true\ positive}{true\ positive + false\ negative}$ , and  $precision = \frac{true\ positive}{true\ positive + false\ positive}$ ), while the original  
492 published shape features (Gustafsdottir et al. 2013) had an  $F_1$  score of 0.826. Notably, the shape-  
493 to-graph mapping had much better performance on the ‘Modulators of Neuronal Receptors’

494 category, with a class  $F_1$  score of 0.769 versus 0.455 for the original shape features (**Fig. 14**) and  
 495 each class appears to form tighter, more distinct clusters with the new features (**Supplemental Fig.**  
 496 **S3**). This treatment is the one which most strongly resembles the control dataset, but the cells tend  
 497 to be much less dense relative to the control wells. This reduced density is captured in the out-  
 498 graph radius metrics for each cell (**Supplemental Fig. S4**).

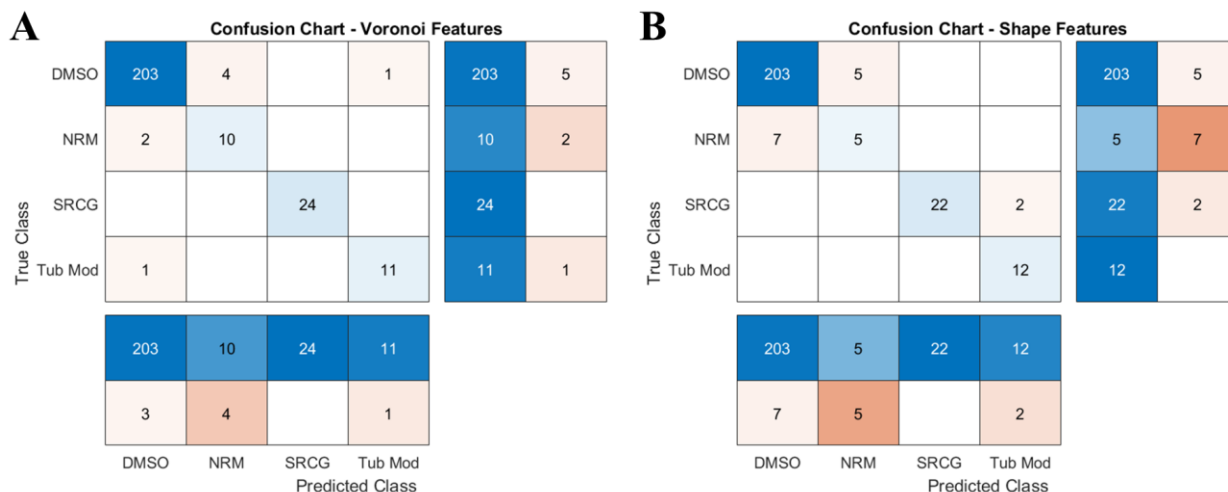

499 **Figure 14.** Held-out plates were classified with a decision tree trained on the remainder of the dataset. The  
 500 new metrics derived with our approach tends to have better classification accuracies, especially for the  
 501 control class and the modulator of neuronal receptors (NRM). Mean  $F_1$  score is 0.916 with the graph  
 502 derived metrics, and 0.826 with the CellProfiler shape metrics.

504  
 505 **Graphical User Interface**

506  
 507 We have created a graphical user interface (GUI) to provide readers with a quick and easy way to  
 508 try our shape-to-graph mapping on their own data (**Fig. 15A**). The GUI can be used to generate  
 509 and display the shape-to-graph mapping for individual images. The user can cycle through all the

510 boundaries in the image and visualize their width and boundary profiles. A table of values of the  
511 forty measures for each boundary is also displayed.

512

513 Additionally, a graphical user interface is provided to generate boundary types from multiple  
514 images (**Fig. 15B**). The user can choose a number of boundary classes and inspect each image  
515 from the imported set with its boundaries colored according to the class they were automatically  
516 assigned based on the features from the shape-to-graph mapping (which can also be displayed).  
517 These visualizations are accompanied with (1) a color-coded histogram showing the boundary type  
518 distribution in the current image, (2) a t-SNE plot of the boundaries across all images, and (3) a  
519 plot of two user-selected principal components calculated based on the boundary type histograms  
520 across all the images. The point corresponding to the current image is highlighted in the PCA plot.

A

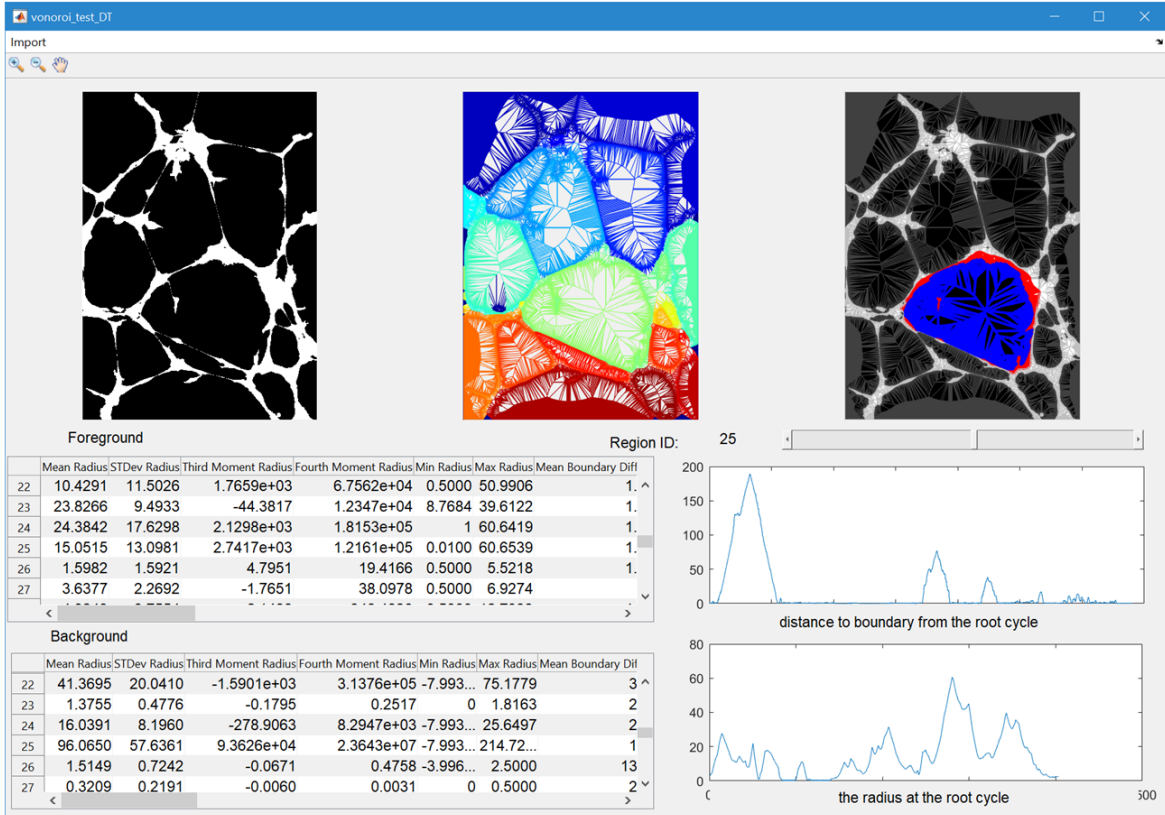

B

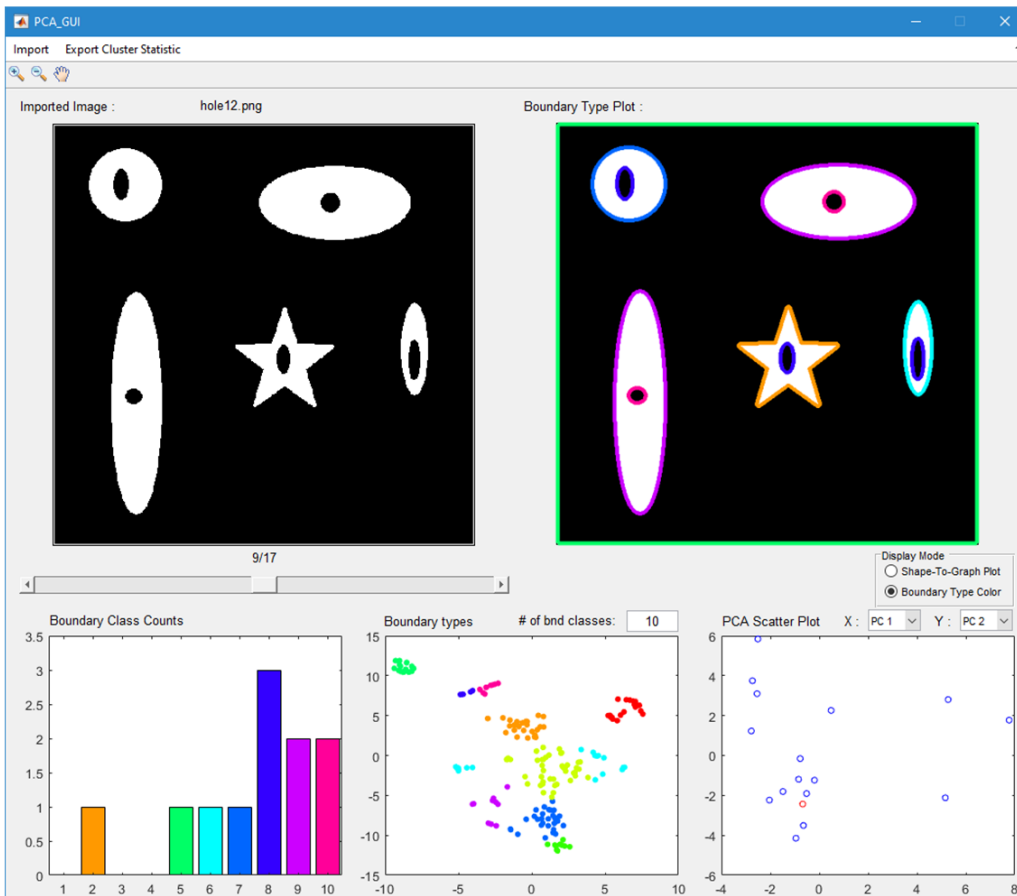

521

522 **Figure 15.** *Two Graphical User Interfaces for demonstrating the graph construction and analysis. A. GUI*  
523 *for illustrating the shape-to-graph approach and the key concepts such as subgraph, in- and out-graphs,*  
524 *and the width and boundary profiles. The user can cycle through the boundaries and see the 40 metrics*  
525 *extracted for each boundary. B. GUI for processing multiple images. Boundaries are automatically*  
526 *clustered and colored according to a user-specified number of boundary types. The bottom graphs are the*  
527 *frequency of boundary types in the current image, a t-SNE of all the boundaries calculated by their features*  
528 *and colored by their resulting class, and a PCA plot of all the images derived from their boundary type*  
529 *histograms.*

530

## 531 **Discussion**

532

533 In this paper we introduced a methodology for extracting, quantifying, and classifying structural  
534 features of an arbitrarily complex pattern in a segmented image. The methodology is based on a  
535 mathematically defined mapping of all boundaries in the binary image onto a global graph. The  
536 graph preserves all the information specified by the boundaries but also provides an efficient and  
537 precise way of defining meaningful metrics for further processing. We illustrated the power of this  
538 approach by analyzing experimental images of human umbilical vein endothelial cells forming  
539 multicellular patterns with different levels of connectivity depending on genetic (*ccm1*, *ccm2*,  
540 *ccm3* knockdowns) and biochemical (Rho kinase inhibition) perturbations. We showed that all the  
541 visually distinguishable patterns could be reliably grouped in different classes using principal  
542 component analyses of boundary types that were defined based on a large set of graph measures.  
543 We also showed that our method is sensitive enough to identify subtle differences in visually  
544 similar patterns. More importantly, after classification, the geometric features that made such  
545 differentiation possible can be backtracked for further analysis or verification. Thus, our method



546 allows not only for statistical quantification of pattern characteristics but also for the discovery of  
547 structural features that are not apparent from visual inspection. This is particularly important for  
548 research projects that aim to determine not only ‘which’ class of patterns a particular image  
549 belongs to, but also ‘why’ it is so in term of intuitively understandable geometric features.

550

551 As another illustration of the strength of our method, we analyzed a set of images generated with  
552 a simulation model with two control parameters responsible for the structural organization of the  
553 multicellular patterns. We showed that after training the algorithm with a subset of images, it could  
554 accurately predict the parameters used for the image generation. It is important to notice that the  
555 stochastic nature of cell-cell interactions in the model creates a variability of patterns in different  
556 simulations even with the same parameters, which can be interpreted as a noise in the data. Despite  
557 this variability, we achieved the correlation coefficients between the predicted and the actual  
558 values of the two control parameters as high as 0.9977 and 0.86695. This result shows that a  
559 biological characteristic influencing the geometry of an observed structure or pattern can be  
560 accurately quantified/predicted directly from the images once the algorithm is trained with a few  
561 images for which this characteristic was measured. One of the applications of such quantification  
562 would be an investigation of the transition dynamics between the known biological states (e.g.  
563 predicting the onset of a diseased phenotype).

564

565 Our methodology works for any binary images. Because we construct the graph for both  
566 foreground and background, the extracted features characterize the geometry of individual objects,  
567 connectivity in networked structures, as well as the relative organization of isolated objects. This  
568 fact makes our method highly versatile and generally applicable. We illustrated this statement

569 reanalyzing a subset of previously published data set from a high throughput assay profiling small-  
570 molecule-induced U2OS cell cultures (Gustafsdottir et al. 2013). We used the same processing  
571 pipeline as in the original study but apply the geometric features from our shape-to-graph mapping.  
572 By comparing a combined metric of precision and sensitivity, the  $F_1$  score, we showed that our  
573 graph representation of the image content provides an improvement in classification performance  
574 of 10% for the three major mechanisms-of-action clusters and 40% for the cluster that differs the  
575 least from the wild type cultures. Saying that, it is important to notice that the initial, pre-processing  
576 step of segmentation is critical and the presented method can be only as accurate as allowed by the  
577 quality of microscopy and the segmentation routine.

578

579

## 580 **Materials and Methods**

581

### 582 *Cell culture*

583

584 Human umbilical cord endothelial cells HUVEC (Lonza, Walkersville, MD) were maintained in  
585 EGM-2 medium (Lonza) at 37°C/5% CO<sub>2</sub> and passaged every 3 to 4 days for up to 6 passages at  
586 a 1:5 sub-culturing ratio. For tube formation experiments, 4.5-5x10<sup>3</sup> cells were plated into each  
587 well of angiogenesis  $\mu$ -slides (ibidi, Fitchburg, WI) coated with 10  $\mu$ l of growth factor reduced  
588 phenol red-free Matrigel (Corning, Corning, NY), and incubated for up to 18 hrs.

589

### 590 *Microscopy*

591

592 For endothelial tubule formation imaging, cells plated on Matrigel were incubated with  
593 CellMask™ Green Plasma Membrane Stain (Invitrogen, Carlsbad, CA) for 15 min at 37°C. The  
594 media was changed to phenol-free EGM-2 supplemented with 2% FBS and growth factors  
595 (PromoCell GmbH). Images were acquired using PerkinElmer UltraVIEW VoX spinning disk  
596 confocal microscope (PerkinElmer, Waltham, MA). Image processing and analysis were  
597 performed using ImageJ software (NIH). Images in Figure 9 represent a 1.2 mm by 1.2 mm areas.  
598 With the plating density of ~ 400 cells per mm<sup>2</sup>, there is ~600 cells in each image.

599

### 600 *Gene expression knockdown*

601

602 To achieve knockdown of CCM protein expression, cells were infected with PLKO.1 vector based  
603 lentiviruses carrying shRNAs for human krit1 (RHS4533-EG889), ccm2 (RMM4534-EG216527),  
604 and pdcd10 (RHS4533-EG11235) genes (Dharmacon, Lafayette, CO). Lentiviral particles,  
605 prepared and purified by VectorBuilder technical service group (VectorBuilder, Santa Clara, CA)  
606 were added to EGM-2 media supplemented with 8µ/mL polybrene for 48 hrs. Transduced cells  
607 were selected through their resistance to puromycin added to the growth media in the concentration  
608 of 2.5 µg/ml. Expression knockdown was measured by real-time PCR with TaqMan gene  
609 expression assays. Phenotypic experiments were conducted between 6 and 10 days after infection.

610

### 611 *Image Preprocessing*

612

613 Simulated images in vector format were rendered at 1024x1024 resolution. By design, the model  
614 generates binary images with all interacting cells and their protrusions being the foreground of the

615 image. All holes smaller than 100 pixels were automatically filled. Multiple fields of view were  
616 sampled from experimental images of tube formation at a fixed resolution of 690x690 pixels. The  
617 images were segmented with a simple threshold followed by manual corrections to under  
618 segmented tubules. Cellular debris below 50 pixels in size were automatically removed.

619  
620 Boundaries were extracted from each binary image. Linear pixel-size segments that connect  
621 boundary points serve as the input to the shape-to-graph mapping algorithm. Rather than defining  
622 boundary points at the center of each pixel at the edge of an object, points on the boundary were  
623 placed on the half-pixel border between an object and the background. This ensures that any object  
624 within the boundary has a non-zero area and any protruding part of an object has a non-zero width.  
625 When operating on label images, boundaries are extracted from the largest four-connected  
626 components for each label. Boundary points are placed half-way between the center of the pixel  
627 and the half-pixel edge used for binary images. This creates a half-pixel sized gap between objects  
628 which share a boundary, and any objects which are one pixel wide will have a width in the Voronoi  
629 diagram of 0.5px.

630

### 631 **Acknowledgements**

632

633 We would like to acknowledge the core facilities at the Parker H. Petit Institute for Bioengineering  
634 and Bioscience at the Georgia Institute of Technology for the use of their shared equipment,  
635 services and expertise. This work was supported by the National Science Foundation grant CCF-  
636 1552784 and the ISAC Marylou Ingram Scholarship to P.Q. and by the U.S. Army Research Office  
637 (ARO) grant W911NF-17-1-0395 to D.T. and by funds from the Marcus Foundation, The Georgia

638 Research Alliance, and the Georgia Tech Foundation through their support of the Marcus Center  
639 for Therapeutic Cell Characterization and Manufacturing (MC3M) at Georgia Tech.

640

641

## 642 **References**

643

644 Arnaoutova I, Kleinman HK. 2010. In vitro angiogenesis: endothelial cell tube formation on gelled  
645 basement membrane extract. *Nat Protoc* 5:628-635.

646 Aurenhammer F. 1991. Voronoi Diagrams - a Survey of a Fundamental Geometric Data Structure.  
647 *Computing Surveys* 23:345-405.

648 Boizeau M-L, Fons P, Cousseins L, Desjobert J, Sibrac D, Michaux C, Nestor A-L, Gautret B, Neil K,  
649 Herbert C. 2013. Automated image analysis of in vitro angiogenesis assay. *Journal of laboratory automation*  
650 18:411-415.

651 Carpenter AE, et al. 2006. CellProfiler: image analysis software for identifying and quantifying cell  
652 phenotypes. *Genome Biol* 7:R100.

653 Carpentier G, Martinelli M, Courty J, Cascone I. 2012. Angiogenesis analyzer for ImageJ. Pages 198-201.  
654 4th ImageJ User and Developer Conference proceedings.

655 Chernaya O, Zhurikhina A, Hladyshau S, Pilcher W, Young KM, Ortner J, Andra V, Sulchek TA,  
656 Tsygankov D. 2018. Biomechanics of Endothelial Tubule Formation Differentially Modulated by Cerebral  
657 Cavernous Malformation Proteins. *iScience* 9:347-358.

658 Conrad C, Erfle H, Warnat P, Daigle N, Lorch T, Ellenberg J, Pepperkok R, Eils R. 2004. Automatic  
659 identification of subcellular phenotypes on human cell arrays. *Genome Res* 14:1130-1136.

660 Grélard F, Baldacci F, Vialard A, Domenger J-P. 2017. New methods for the geometrical analysis of tubular  
661 organs. *Medical image analysis* 42:89-101.

662 Guidolin D, Vacca A, Nussdorfer GG, Ribatti D. 2004. A new image analysis method based on topological  
663 and fractal parameters to evaluate the angiostatic activity of docetaxel by using the Matrigel assay in vitro.  
664 *Microvasc Res* 67:117-124.

665 Gupta D, Venugopal J, Prabhakaran MP, Dev VR, Low S, Choon AT, Ramakrishna S. 2009. Aligned and  
666 random nanofibrous substrate for the in vitro culture of Schwann cells for neural tissue engineering. *Acta*  
667 *Biomater* 5:2560-2569.

668 Gustafsdottir SM, et al. 2013. Multiplex Cytological Profiling Assay to Measure Diverse Cellular States.  
669 *Plos One* 8.

670 Khoo CP, Micklem K, Watt SM. 2011. A comparison of methods for quantifying angiogenesis in the  
671 Matrigel assay in vitro. *Tissue Eng Part C Methods* 17:895-906.

672 Lin G, Bjornsson CS, Smith KL, Abdul-Karim MA, Turner JN, Shain W, Roysam B. 2005. Automated  
673 image analysis methods for 3-D quantification of the neurovascular unit from multichannel confocal  
674 microscope images. *Cytometry Part A: The Journal of the International Society for Analytical Cytology*  
675 66:9-23.

676 Ljosa V, Sokolnicki KL, Carpenter AE. 2012. Annotated high-throughput microscopy image sets for  
677 validation. *Nature Methods* 9:637-637.

678 ---. 2013. Annotated high-throughput microscopy image sets for validation (vol 9, pg 637, 2012). *Nature*  
679 *Methods* 10:445-445.

680 Murphy EA, et al. 2010. Disruption of angiogenesis and tumor growth with an orally active drug that  
681 stabilizes the inactive state of PDGFRbeta/B-RAF. *Proc Natl Acad Sci U S A* 107:4299-4304.

682 Nguyen M, Shing Y, Folkman J. 1994. Quantitation of angiogenesis and antiangiogenesis in the chick  
683 embryo chorioallantoic membrane. *Microvasc Res* 47:31-40.

684 Ogniewicz RL, Kübler O. 1995. Hierarchic voronoi skeletons. *Pattern recognition* 28:343-359.

685 Rohde GK, Ribeiro AJ, Dahl KN, Murphy RF. 2008. Deformation-based nuclear morphometry: Capturing  
686 nuclear shape variation in HeLa cells. *Cytometry Part A: The Journal of the International Society for*  
687 *Analytical Cytology* 73:341-350.

688 Selinummi J, Seppala J, Yli-Harja O, Puhakka JA. 2005. Software for quantification of labeled bacteria  
689 from digital microscope images by automated image analysis. *Biotechniques* 39:859-863.

690 Styner M, Gerig G, Lieberman J, Jones D, Weinberger D. 2003. Statistical shape analysis of  
691 neuroanatomical structures based on medial models. *Medical image analysis* 7:207-220.

692 Tsygankov D, Bilancia CG, Vitriol EA, Hahn KM, Peifer M, Elston TC. 2014. CellGeo: a computational  
693 platform for the analysis of shape changes in cells with complex geometries. *J Cell Biol* 204:443-460.

694 Viros A, Fridlyand J, Bauer J, Lasithiotakis K, Garbe C, Pinkel D, Bastian BC. 2008. Improving melanoma  
695 classification by integrating genetic and morphologic features. *PLoS Med* 5:e120.

696 Wearne S, Rodriguez A, Ehlenberger D, Rocher A, Henderson S, Hof P. 2005. New techniques for imaging,  
697 digitization and analysis of three-dimensional neural morphology on multiple scales. *Neuroscience*  
698 136:661-680.

699 Xin SQ, Wang XN, Xia JZ, Mueller-Wittig W, Wang GJ, He Y. 2013. Parallel computing 2D Voronoi  
700 diagrams using untransformed sweepcircles. *Computer-Aided Design* 45:483-493.

701 Xiong Y, Kabacoff C, Franca-Koh J, Devreotes PN, Robinson DN, Iglesias PA. 2010. Automated  
702 characterization of cell shape changes during amoeboid motility by skeletonization. *BMC systems biology*  
703 4:33.

704 Zanella F, Lorens JB, Link W. 2010. High content screening: seeing is believing. *Trends Biotechnol*  
705 28:237-245.

706

## 707 **Supporting information**

708 1. Supplemental Information with Figures and Tables in a single PDF file.

709 2. All Scripts and GUIs in a single ZIP file.

710
